# Supplementary material
Source: PubMed Central journal article supplement (PMC7442647)
Supplement: NIHMS1587725-supplement-3.pdf [file NIHMS1587725-supplement-3.pdf]

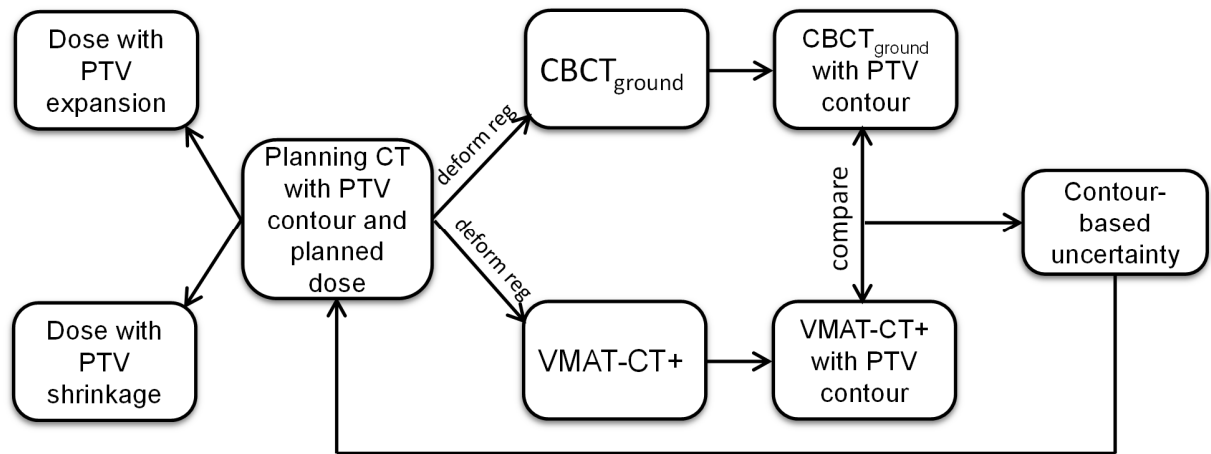

**Supplemental Fig. 3.** Workflow of evaluation of deformable registration uncertainty. deform reg: deformable registration
