# Supplementary material
Source: PubMed Central journal article supplement (PMC7442647)
Supplement: NIHMS1587725-supplement-4.pdf [file NIHMS1587725-supplement-4.pdf]

### Plan 1

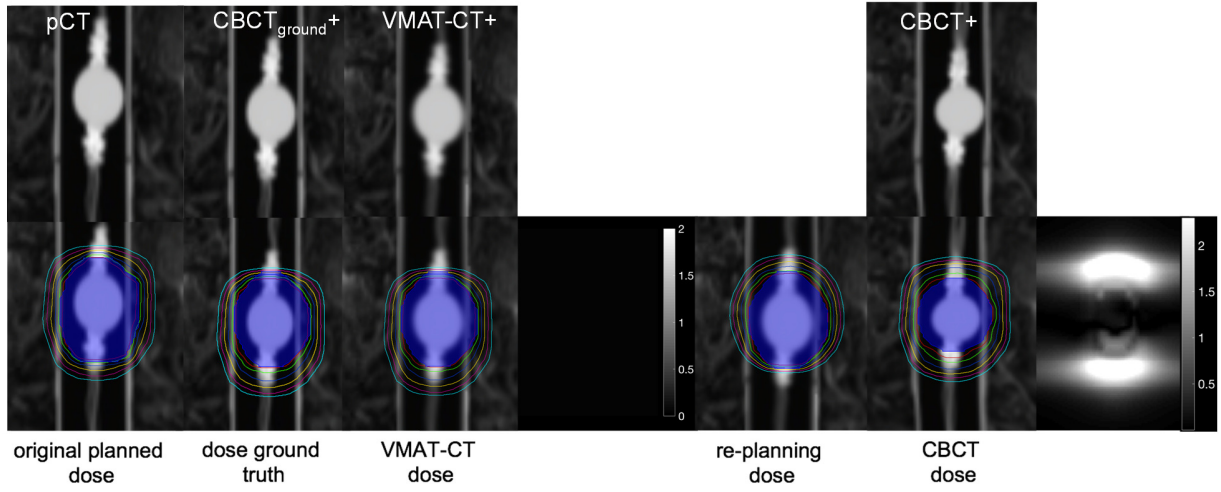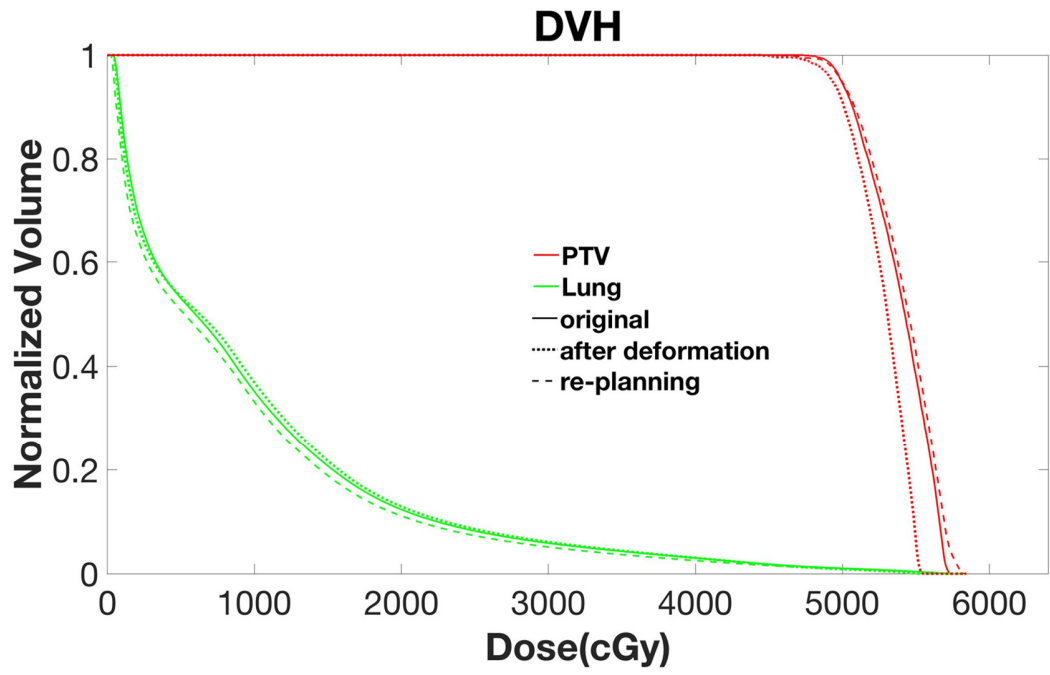

## Plan 2

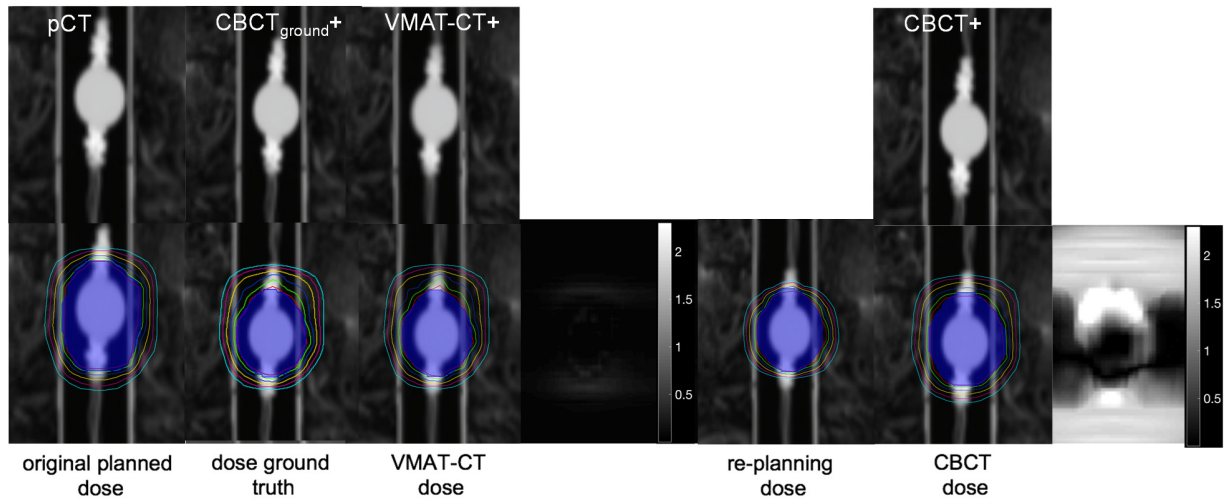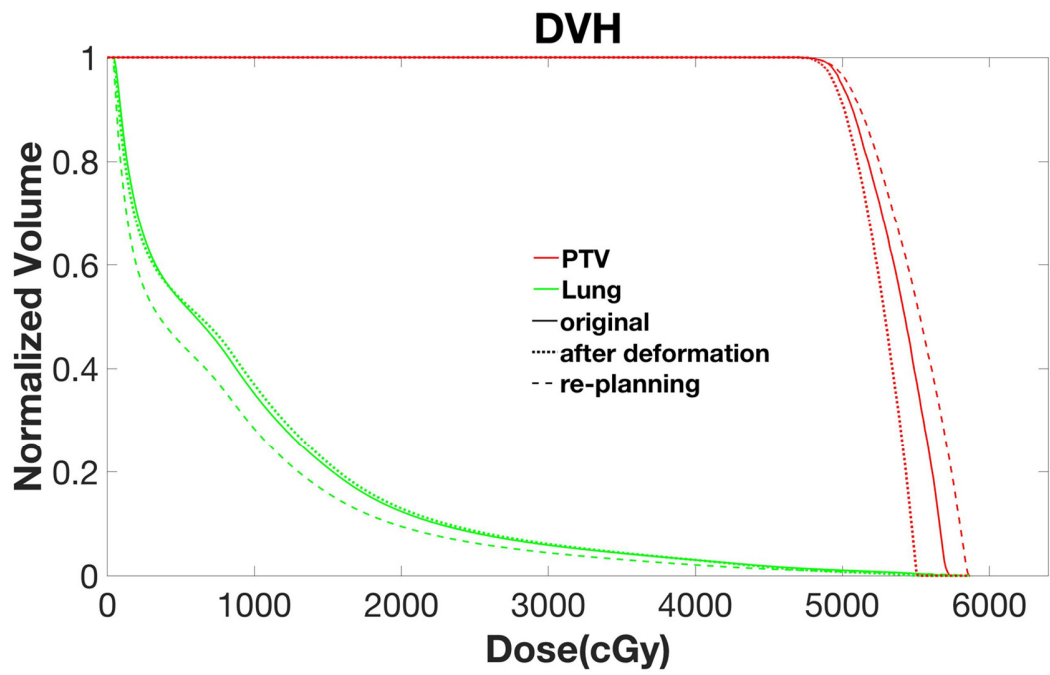

### Plan 3

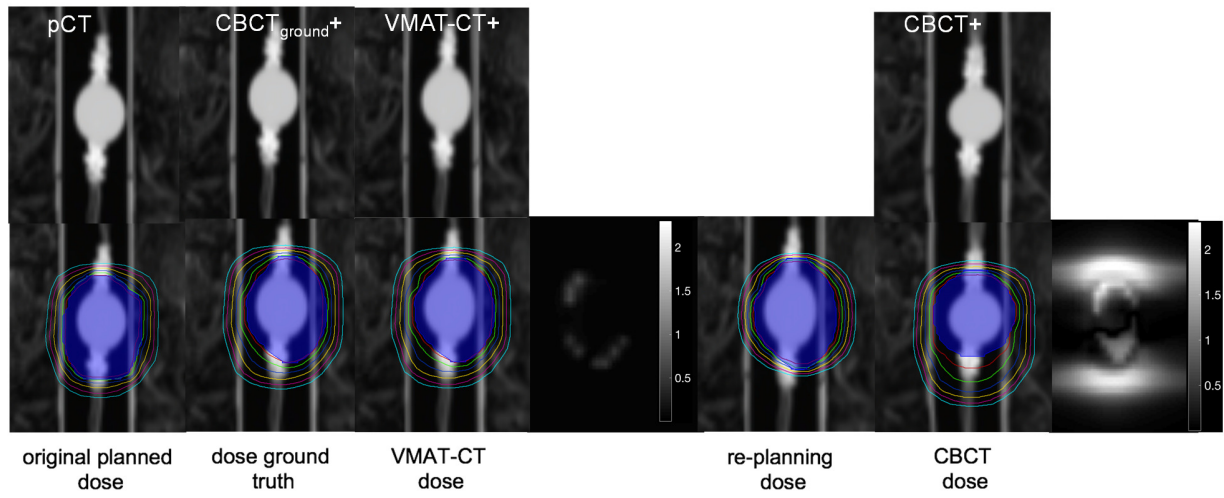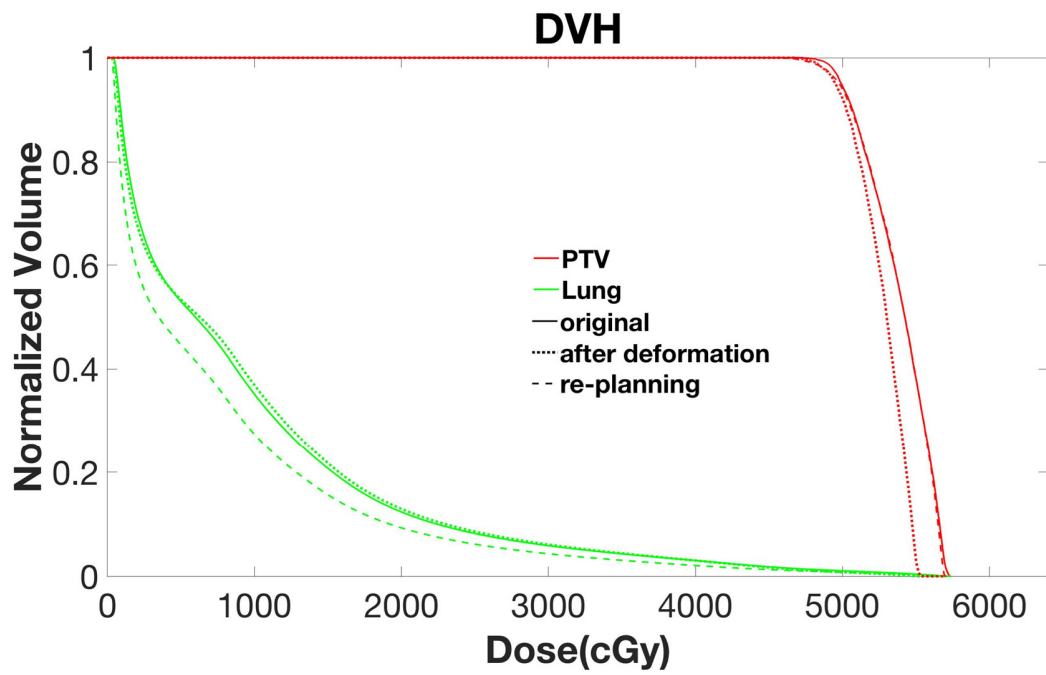

**Supplement Fig. 4.** Deformation and dose calculations based on three different deformable plans for the deformable lung phantom.
