# Supplementary material
Source: PubMed Central journal article supplement (PMC7442647)

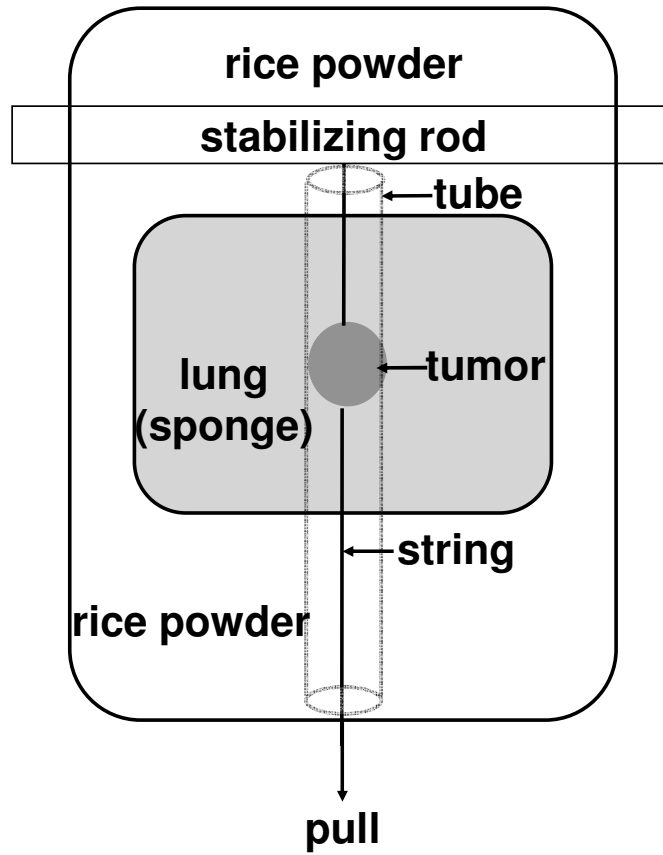

**Supplemental Fig. 1.** Descriptive figure of the in-house deformable lung phantom.

Supplement: NIHMS1587725-supplement-1.pdf [file NIHMS1587725-supplement-1.pdf]

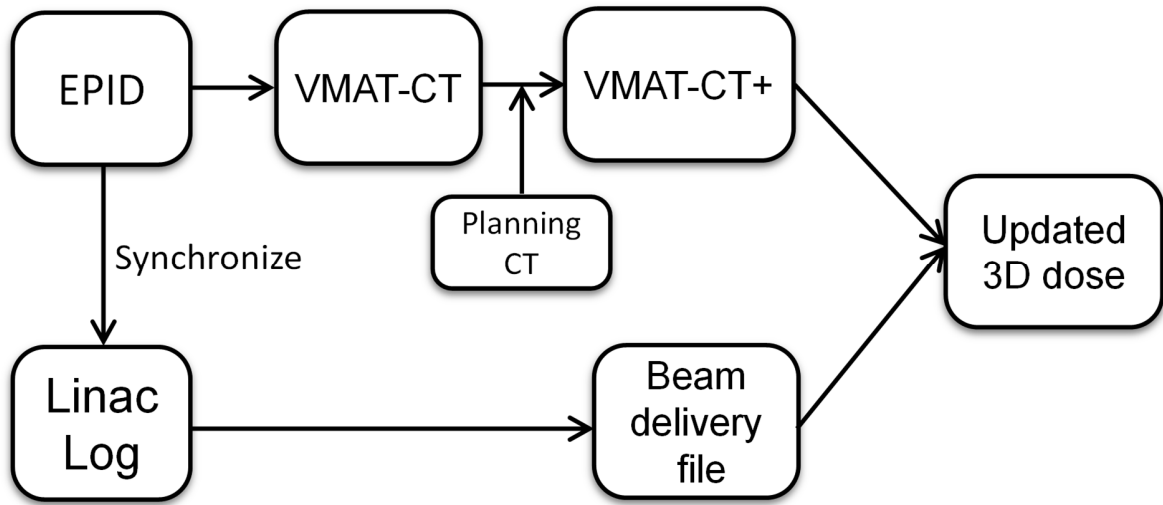

**Supplemental Fig. 2.** Workflow of 3D dose reconstruction based on VMAT-CT+.

Supplement: NIHMS1587725-supplement-2.pdf [file NIHMS1587725-supplement-2.pdf]
